# Supplementary material for: METTL3-Mediated lncSNHG7 m6A Modification in the Osteogenic/Odontogenic Differentiation of Human Dental Stem Cells
Source: MDPI journal article supplement (doi:10.3390/jcm12010113), 2022-12-23
Supplement: s1 [file s1]

Table S2 Prediction of m<sup>6</sup>A modifying enzymes possibly bound to lncSNHG7

| RBP       | GeneID          | GeneName | GeneType  | ClusterNum | ClipExpNum | ClipSiteNum | HepG2(log2FC) | K562(log2FC) | Pan-Cancer |
|-----------|-----------------|----------|-----------|------------|------------|-------------|---------------|--------------|------------|
| IGF2BP1   | ENSG00000233016 | SNHG7    | antisense | 15         | 5          | 25          | -0.649        | NA           | 12         |
| IGF2BP2   | ENSG00000233016 | SNHG7    | antisense | 20         | 8          | 42          | -0.753        | NA           | 14         |
| IGF2BP3   | ENSG00000233016 | SNHG7    | antisense | 13         | 9          | 24          | -1.224        | NA           | 17         |
| FTO       | ENSG00000233016 | SNHG7    | antisense | 5          | 1          | 5           | NA            | NA           | 21         |
| FMR1      | ENSG00000233016 | SNHG7    | antisense | 17         | 8          | 44          | NA            | NA           | 19         |
| WTAP      | ENSG00000233016 | SNHG7    | antisense | 3          | 2          | 4           | NA            | NA           | 13         |
| YTHDC1    | ENSG00000233016 | SNHG7    | antisense | 6          | 5          | 9           | NA            | NA           | 12         |
| YTHDF1    | ENSG00000233016 | SNHG7    | antisense | 7          | 2          | 7           | NA            | NA           | 16         |
| METTL3    | ENSG00000233016 | SNHG7    | antisense | 1          | 4          | 4           | NA            | NA           | 20         |
| METTL14   | ENSG00000233016 | SNHG7    | antisense | 4          | 4          | 9           | NA            | NA           | 17         |
| ALKBH5    | ENSG00000233016 | SNHG7    | antisense | 1          | 1          | 1           | NA            | NA           | 12         |
| HNRNPA2B1 | ENSG00000233016 | SNHG7    | antisense | 3          | 6          | 13          | NA            | 0.696        | 13         |
| HNRNPC    | ENSG00000233016 | SNHG7    | antisense | 17         | 8          | 39          | NA            | NA           | 16         |
