# Supplementary material for: METTL3-Mediated lncSNHG7 m6A Modification in the Osteogenic/Odontogenic Differentiation of Human Dental Stem Cells
Source: MDPI journal article supplement (doi:10.3390/jcm12010113), 2022-12-23
Supplement: s1 [file s1]

Table S1 Prediction of m<sup>6</sup>A modification sites of lncSNHG7

| Number | Position | Sequence context                                                                          | Score<br>(binary) | Score<br>(knn) | Score<br>(spectrum) | Score<br>(combined) | Decision               |
|--------|----------|-------------------------------------------------------------------------------------------|-------------------|----------------|---------------------|---------------------|------------------------|
| 1      | 393      | GAGGU GACUU CGCCU<br>GUGAU GGACU UCCAG<br>UGUGA GCACU GGCCA<br>GAGUA <b>ACA</b> AAA CCCCC | 0.767             | 0.792          | 0.498               | 0.66                | (High confidence)      |
| 2      | 529      | UUGGA GGACU CUCCU<br>GCCGG GAUGU CCAUG<br>UGGAA UCCAG AGCCC                               | 0.702             | 0.704          | 0.688               | 0.697               | (Very high confidence) |
| 3      | 614      | UGACG GGACA GCAGC<br>AGCAG GAACU CGUUA<br>UGACG GG <b>ACA</b> GCAGC                       | 0.602             | 0.632          | 0.674               | 0.632               | (High confidence)      |
| 4      | 629      | AGCAG GAACU CGUUA<br>CGCUG CAGCA GGGCC<br>CGCUG CAGCA GGGCC                               | 0.677             | 0.682          | 0.673               | 0.676               | (Very high confidence) |
| 5      | 659      | CACAC GGACU UGGCU<br>UCCGC CAGGG ACACC<br>ACGGA CUUGG CUUCC                               | 0.746             | 0.831          | 0.549               | 0.671               | (High confidence)      |
| 6      | 677      | GCCAG GGACA CCCGG<br>UUGUC CUUGU UGAAG<br>GUUGA AGUCA GCCAU                               | 0.618             | 0.801          | 0.578               | 0.611               | (High confidence)      |
| 7      | 715      | GAGCA GGACC UGGCC<br>AACCA GCGCC GGCAG<br>UUCGG GGCAC CUGCC                               | 0.602             | 0.794          | 0.667               | 0.637               | (High confidence)      |
| 8      | 1163     | CUGCU GGACA CACGG                                                                         | 0.627             | 0.674          | 0.628               | 0.63                | (High confidence)      |

|    |      |                                                              |       |       |       |       |                        |
|----|------|--------------------------------------------------------------|-------|-------|-------|-------|------------------------|
|    |      | CCCUU GACUG CAGGA<br>CCUGC UGGAC ACACG                       |       |       |       |       |                        |
| 9  | 1177 | GCCCU UGACU GCAGG<br>AGCCU CCCC U CGACC<br>UGGGC AUAUG ACCGU | 0.554 | 0.743 | 0.615 | 0.588 | (Moderate confidence)  |
| 10 | 1388 | GGUGU GGACU CCUGC<br>CCUGC CCCC U AGGAG<br>CCAGA GCCCG CUGUA | 0.682 | 0.761 | 0.329 | 0.544 | (Low confidence)       |
| 11 | 1603 | CACCU GGACA GGGCC<br>ACAGA GGUCC UCCGU<br>GCCAC AGAGG UCCUC  | 0.672 | 0.804 | 0.631 | 0.662 | (High confidence)      |
| 12 | 1630 | CGUGC AGACA UCCCC<br>CUCCC ACUGC ACGGG<br>CACAG CAAAG GCCAC  | 0.476 | 0.813 | 0.648 | 0.562 | (Moderate confidence)  |
| 13 | 2081 | UGCCU GGACA UGAGA<br>CACAC ACCAC ACCCA                       | 0.695 | 0.749 | 0.735 | 0.714 | (Very high confidence) |
| 14 | 2088 | AAGGC CACUG CCUGG<br>ACAUG AGACA CACAC<br>CACAC CCAGU GUCGA  | 0.46  | 0.649 | 0.731 | 0.578 | (Moderate confidence)  |
| 15 | 2136 | CACGC CAGGG CCAGA<br>GGCAG GAACC UGGAG<br>GCAGC UCUCC GCCCA  | 0.437 | 0.534 | 0.763 | 0.572 | (Moderate confidence)  |

|    |      |                                                             |           |       |       |       |                       |
|----|------|-------------------------------------------------------------|-----------|-------|-------|-------|-----------------------|
| 16 | 2175 | CGCCC AGCCG ACCCA<br>GCUCU GGACC AUCCA<br>GGCAU UGGCC GGUGA | 0.583     | 0.622 | 0.765 | 0.658 | (High confidence)     |
| 17 | 2198 | CCAUC CAGGC AUUGG<br>CCGGU GAACU AGAAU<br>UCACA CUAGU CCCUA | 0.548     | 0.493 | 0.718 | 0.613 | (High confidence)     |
| 18 | 2262 | CCACA CGCGC GCUCU<br>CUGCC UGACU CUUCA<br>UUCCU GCCUC GGGUG | 0.4<br>85 | 0.642 | 0.685 | 0.573 | (Moderate confidence) |
| 19 | 2349 | CCUGC CCGGA AUAGU<br>AAGUG AGACA UUUCU<br>G---- ----        | 0.5<br>12 | 0.614 | 0.561 | 0.537 | (Low confidence)      |

---
